# Supplementary material
Source: HighWire-hosted journal article supplement (https://erj.ersjournals.com/content/suppl/2016/11/11/13993003.00484-2016)
Supplement: ERJ-00484-2016_Supplement.pdf [file ERJ-00484-2016_Supplement.pdf]

Online Supplement:

An association of particulate air pollution and traffic exposure with mortality after lung transplantation in Europe

D. Ruttens<sup>1\*</sup>, S.E. Verleden<sup>1\*</sup>, E.M. Bijmens<sup>2</sup>, E. Winckelmans<sup>2</sup>, J. Gottlieb<sup>3</sup>, G. Warnecke<sup>3</sup>, F. Meloni<sup>4</sup>, M. Morosini<sup>4</sup>, W. Van Der Bij<sup>5</sup>, E.A. Verschuuren<sup>5</sup>, U. Sommerwerck<sup>6</sup>, G. Weinreich<sup>6</sup>, M. Kamler<sup>6</sup>, A. Roman<sup>7,8</sup>, S. Gomez Olles<sup>7,8</sup>, C. Berastegui<sup>7</sup>, C. Benden<sup>9</sup>, A.M. Holm<sup>10</sup>, M. Iversen<sup>11</sup>, H.H. Schultz<sup>11</sup>, B. Luijk<sup>12</sup>, E.J. Oudijk<sup>12</sup>, J.M. Kwakkel-van Erp<sup>12</sup>, P. Jaksch<sup>13</sup>, W. Klepetko<sup>13</sup>, N. Kneidinger<sup>14</sup>, C. Neurohr<sup>14</sup>, P. Corris<sup>15</sup>, A.J. Fisher<sup>15</sup>, J. Lordan<sup>15</sup>, G. Meachery<sup>15</sup>, D. Piloni<sup>1,4</sup>, E. Vandermeulen<sup>1</sup>, H. Bellon<sup>1</sup>, B. Hoffmann<sup>16</sup>, D. Vienneau<sup>17,18</sup>, G. Hoek<sup>12</sup>, K. de Hoogh<sup>17,18</sup>, B. Nemery<sup>1</sup>, G.M. Verleden<sup>1</sup>, R. Vos<sup>1</sup>, T.S. Nawrot<sup>2</sup>, B.M. Vanaudenaerde<sup>1</sup>

<sup>1</sup>KULeuven, Leuven, Belgium; <sup>2</sup>Hasselt University, Hasselt, Belgium; <sup>3</sup>Hannover Medical school, Hannover, Germany; <sup>4</sup>Universita degli studi di Pavia, Pavia, Italy; <sup>5</sup>University Medical Center Groningen, University of Groningen, Groningen, the Netherlands; <sup>6</sup>Department of Pneumology, Ruhrlandklinik, University Hospital Essen, University Duisburg-Essen, Essen, Germany; <sup>7</sup>Hospital Vall d'Hebron, Universitat Autònoma de Barcelona Barcelona, Spain; <sup>8</sup>CIBER Enfermedades Respiratorias (Ciberes), Barcelona, Spain <sup>9</sup>University hospital Zurich, Zurich, Switzerland; <sup>10</sup>University of Oslo, Oslo, Norway; <sup>11</sup>Copenhagen university hospital Rigshospitalet, Copenhagen, Denmark; <sup>11</sup>University Medical Center Utrecht/ St. Antonius Hospital Nieuwegein, Utrecht, The Netherlands; <sup>13</sup>University of Vienna, Vienna, Austria; <sup>14</sup>Klinikum Großhadern der LMU, Munich, Germany; <sup>15</sup>Newcastle University, Newcastle, United Kingdom; <sup>16</sup>IUF Leibniz Research Institute for Environmental Medicine and Medical Faculty, University of Dusseldorf, Dusseldorf, Germany; <sup>17</sup>Swiss Tropical and Public Health Institute, Basel, Switzerland and <sup>18</sup>University of Basel, Basel, Switzerland.

|                                                                                                                  |           |
|------------------------------------------------------------------------------------------------------------------|-----------|
| <b>Figure E1:</b> A flow chart of the patient exclusion                                                          | <b>2</b>  |
| <b>Figure E2:</b> An explanation of bufferzone, road length in a buffer zone, distance to major road and freeway | <b>3</b>  |
| <b>Figure E3:</b> Distribution of road length in 200 m buffer zone per transplant center                         | <b>6</b>  |
| <b>Figure E4:</b> Sensitivity analysis for lung transplant center                                                | <b>7</b>  |
|                                                                                                                  |           |
| <b>Table E1:</b> Extended patient characteristics per center                                                     | <b>8</b>  |
| <b>Table E2:</b> Cox analysis without macrolides stratification                                                  | <b>10</b> |
| <b>Table E3:</b> P-values for interaction of macrolides                                                          | <b>11</b> |
| <b>Table E4:</b> Hazard ratio's of comparing quintiles                                                           | <b>12</b> |
| <b>Table E5:</b> Sensitivity analysis for smoking and socio-economic status (SES)                                | <b>13</b> |
| <b>Table E6:</b> Sensitivity analysis for timing of macrolides                                                   | <b>14</b> |
| <b>Table E7:</b> Time-dependency of macrolide therapy                                                            | <b>15</b> |

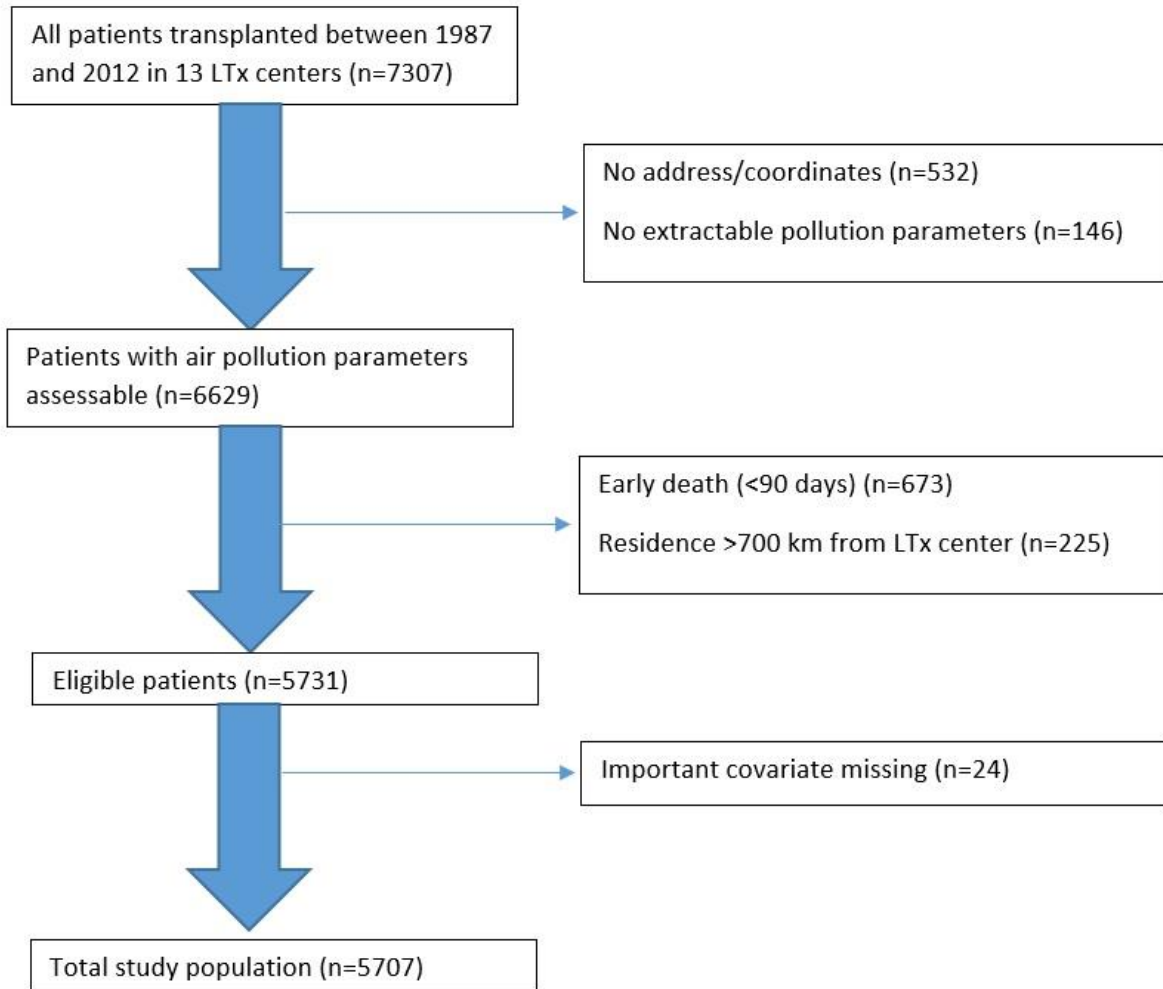

**Figure E1:** A flow chart of the exclusion of patients within this European cohort of lung transplant patients.

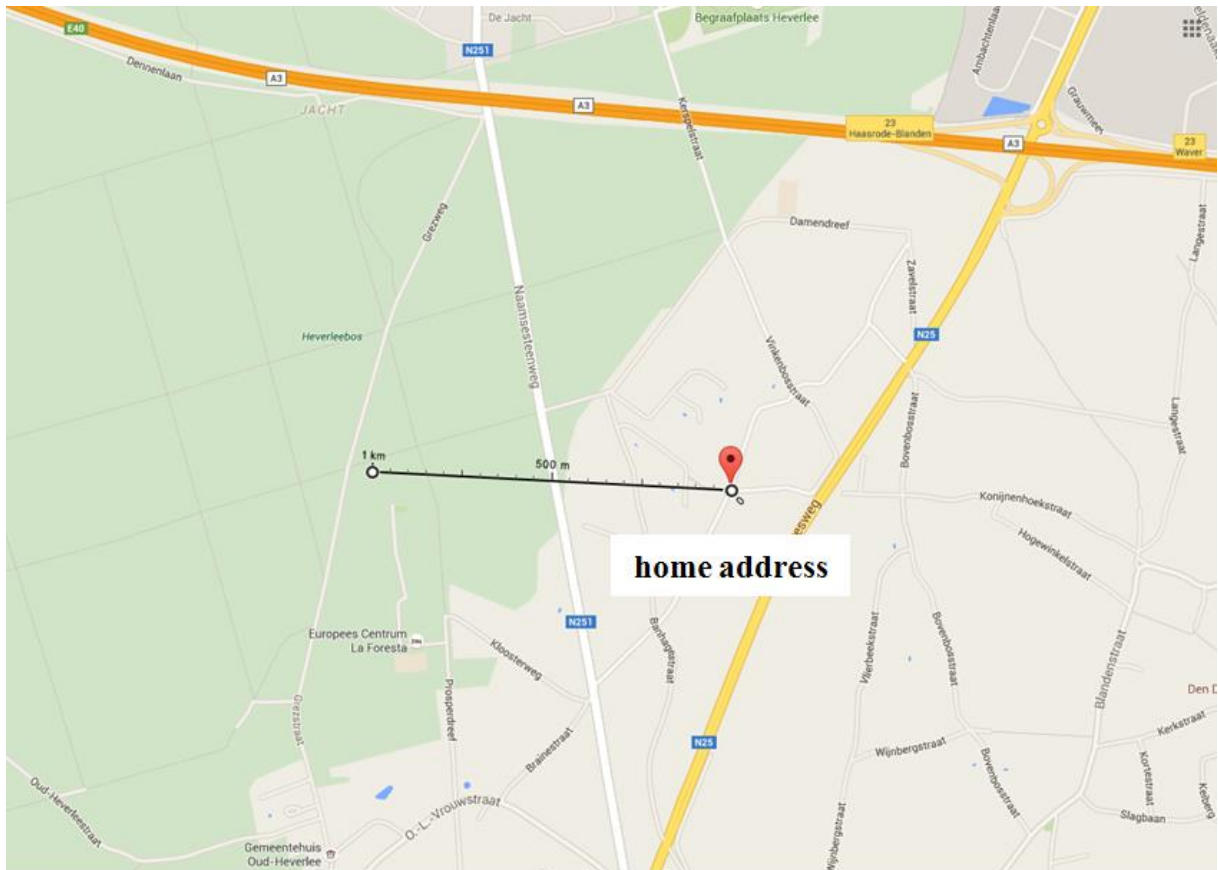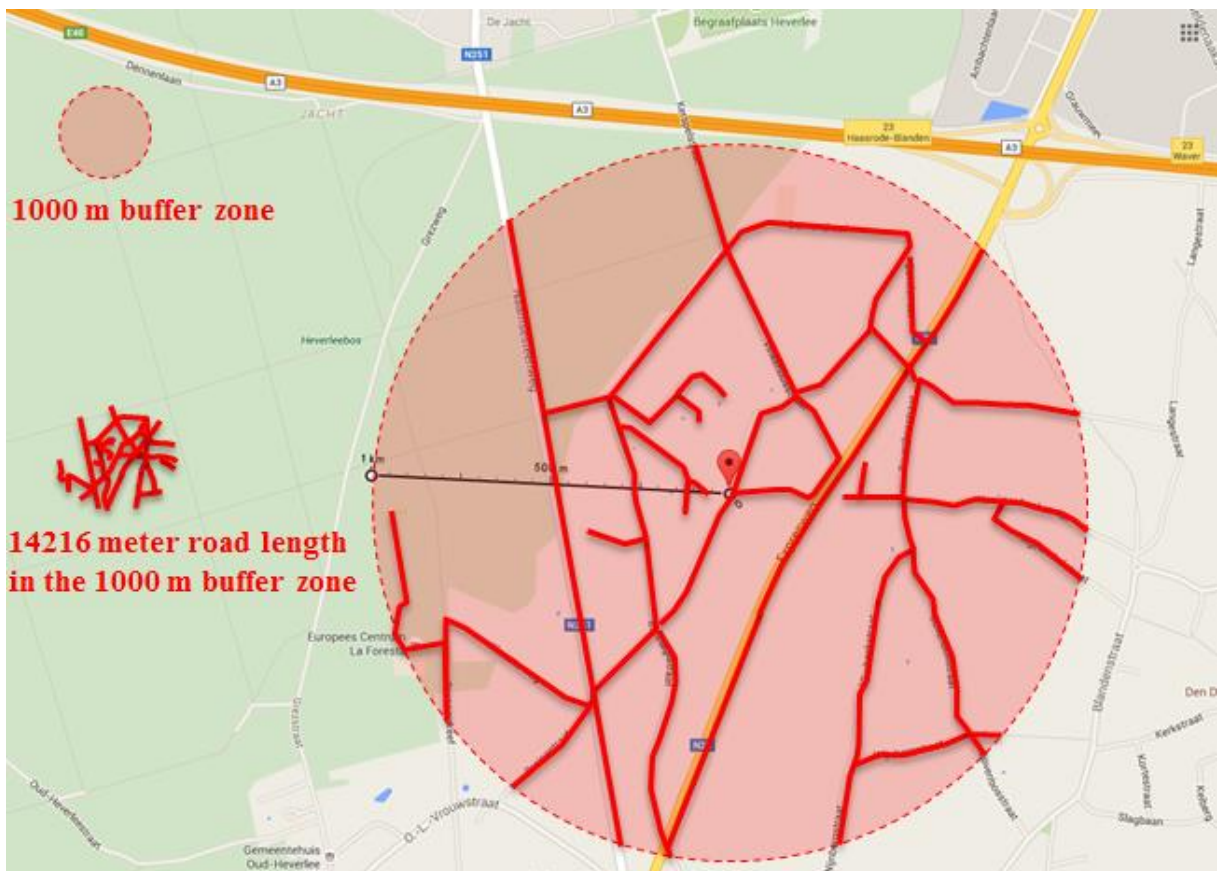

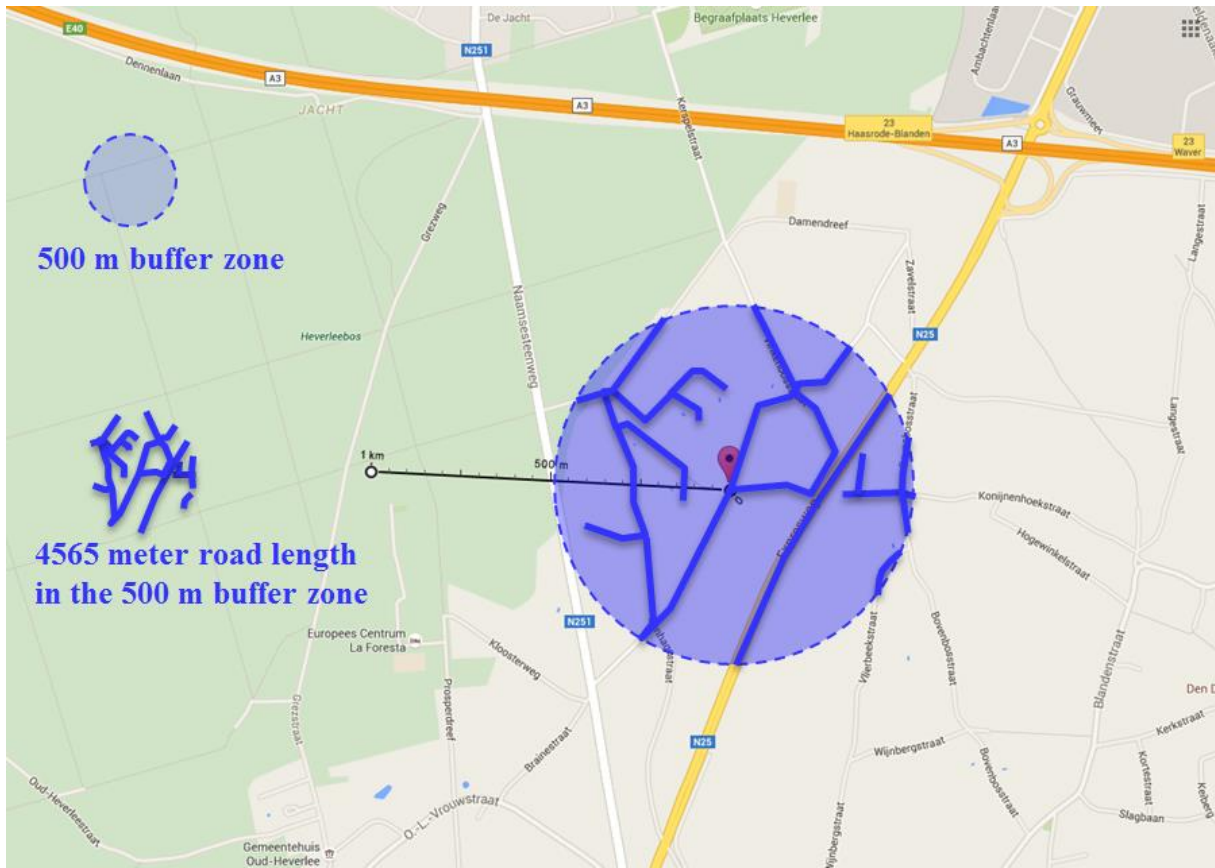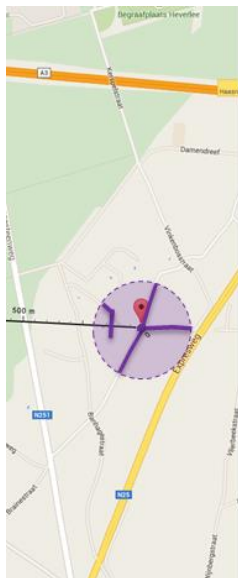

**200 m buffer zone**

**629 meter road length in the 200 m buffer zone**

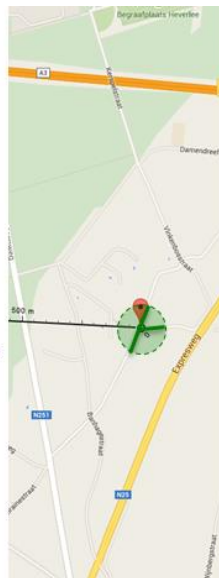

**100 m bufferzone**

**323 meter road length in the 100 m buffer zone**

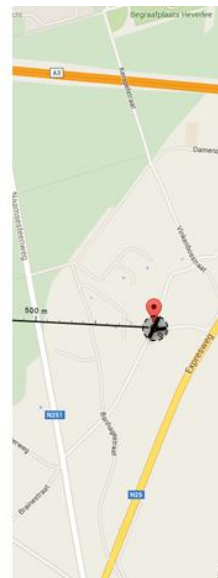

**50 m bufferzone**

**162 meter road length in the 50 m buffer zone**

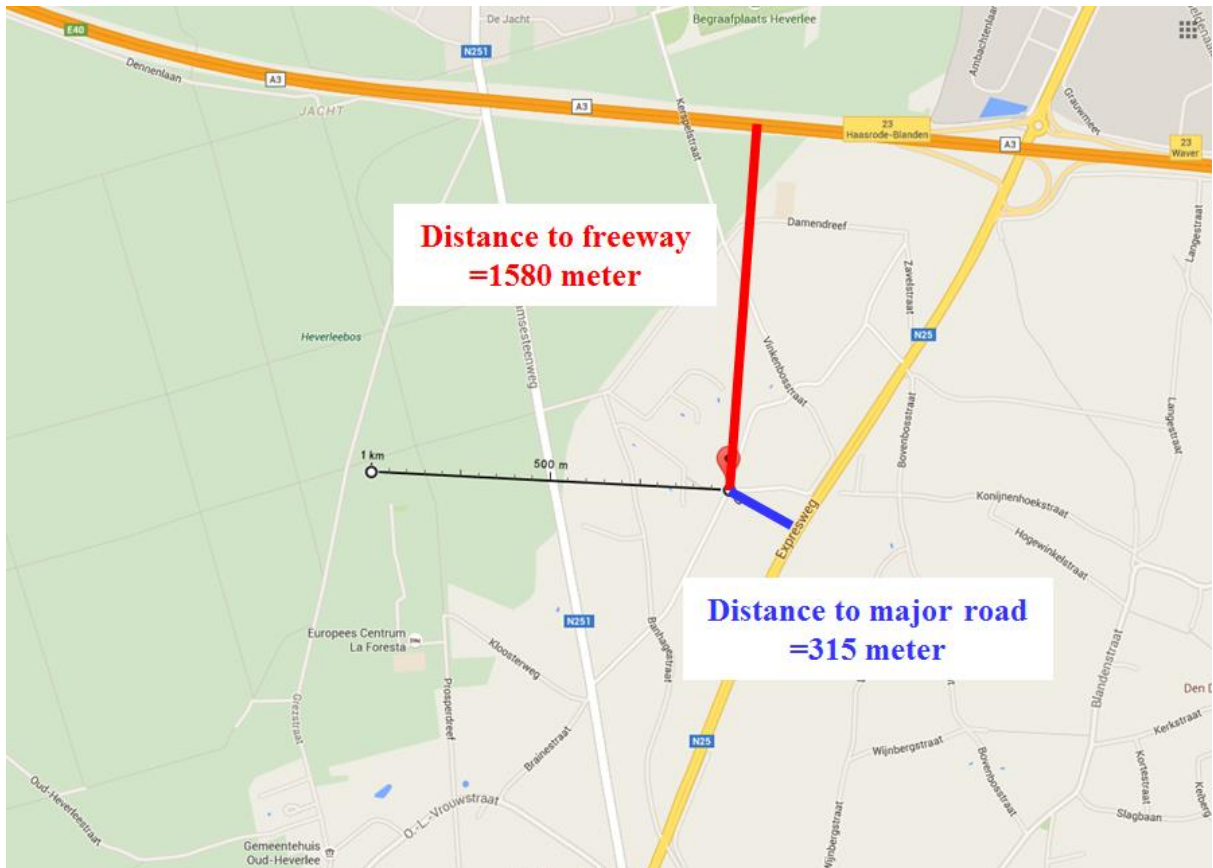

**Figure E2:** The visual presentation of the buffer zones (50m, 100m, 200m, 500m and 1000m) and their road length around a home address together with the distance to a major road and freeway.

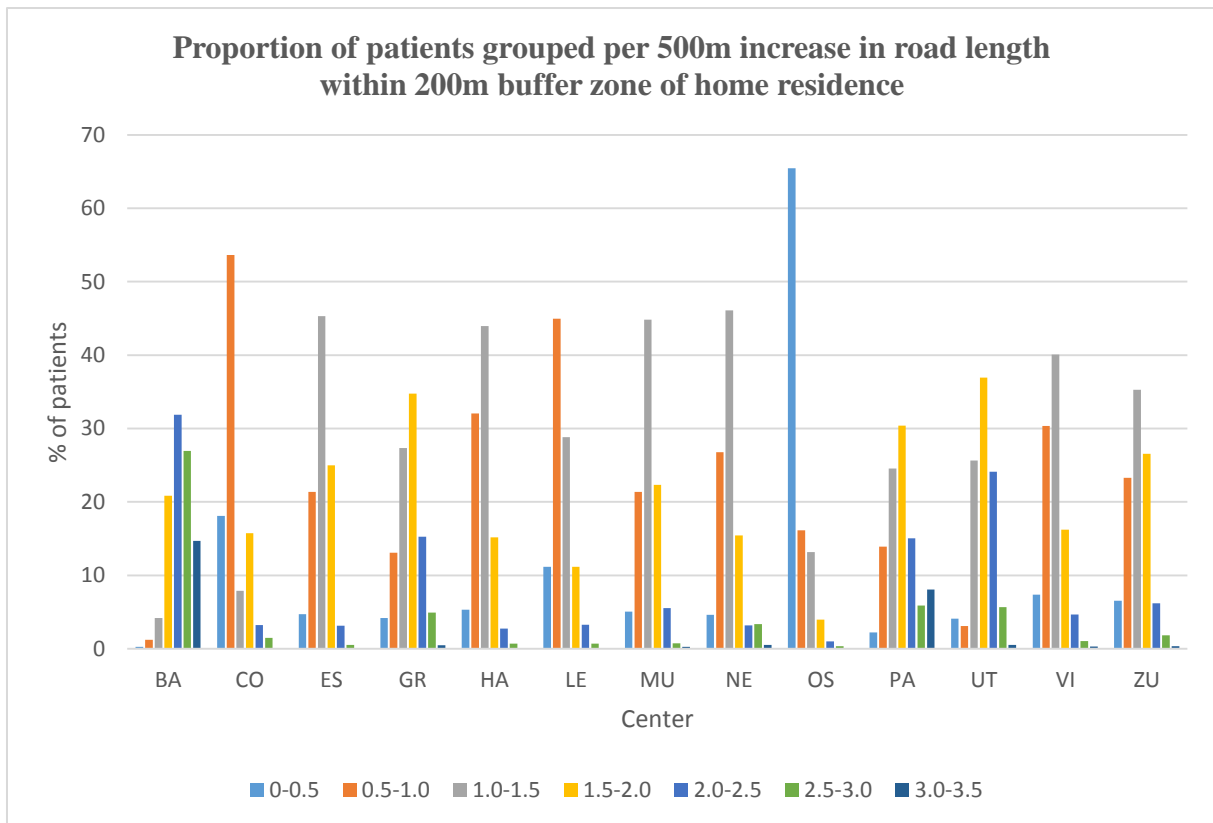

**Figure E3:** The distribution of the % of patients per center according to the road length in a 200 m buffer zone around patient’s residence. Patients are divided into groups having <0.5km of road, 0.5-1.0 km, 1.0-1.5 km, 1.5-2.0 km, 2.0-2.5 km, 2.5-3.0 km and >3.0km within the 200m buffer zone around the patients’ residence. BA=Barcelona, CO=Copenhagen, ES=Essen, GR=Groningen, HA=Hannover, LE=Leuven, MU=Munich, NE=Newcastle, OS=Oslo, PA=Pavia, UT=Utrecht, VI=Vienna, ZU=Zurich.

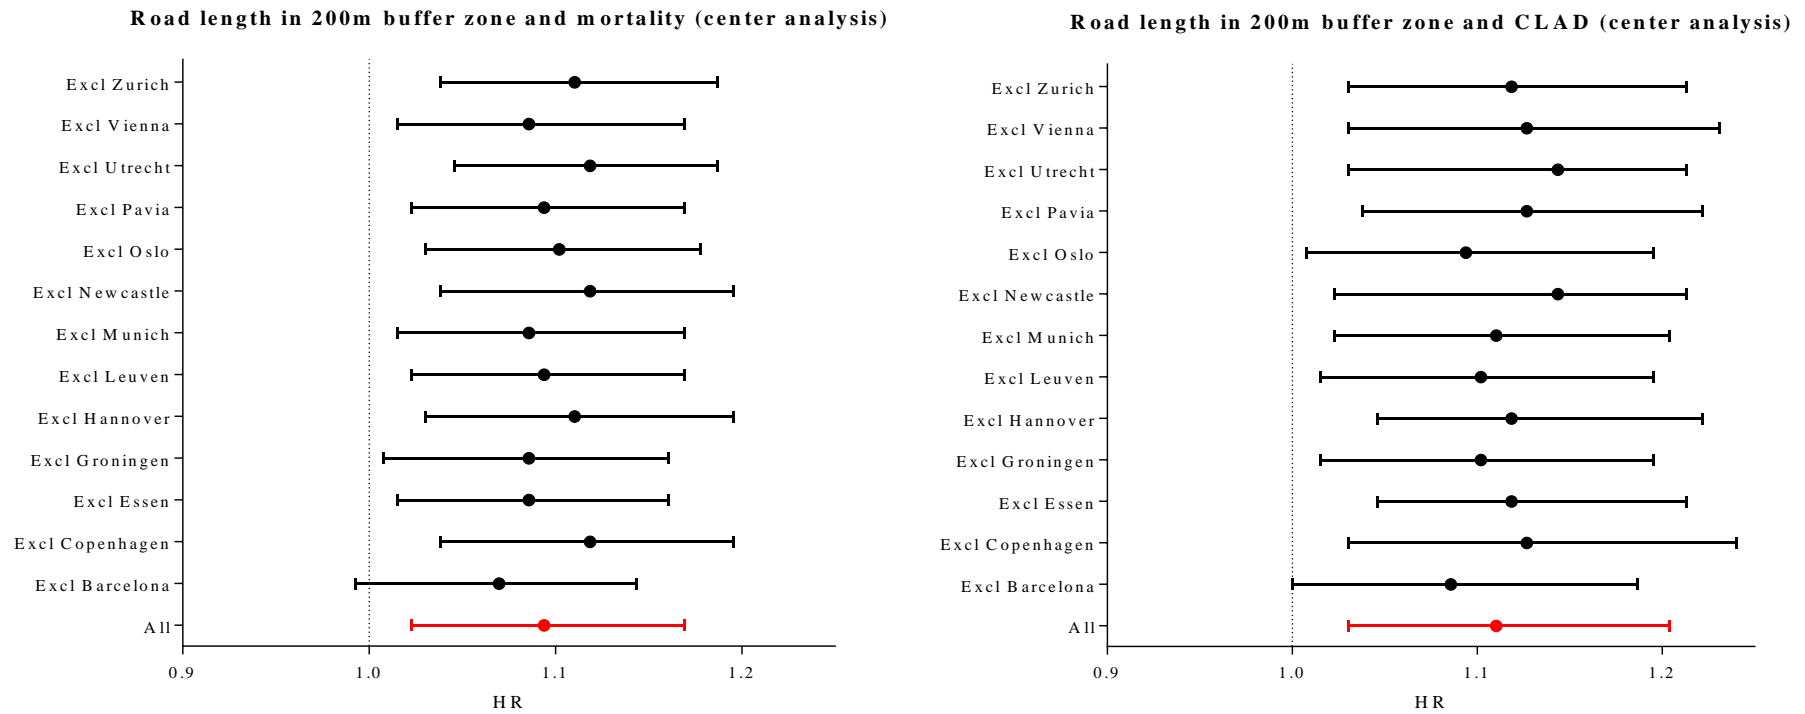

**Figure E4:** The sensitivity analysis demonstrating the effect of excluding a single center on the association between the road length in a 200 m buffer zone around patients' residence and mortality (left) and CLAD (right). This graph shows the HR and 95% CI of the analysis of the 12 remaining analysis after one-by-one exclusion. We observe that there is no single center that explains the results of our analysis. Exclusion of Barcelona implies the biggest effect as the association of the remaining 12 centers only tends to be significant. This is probably explained by the relatively high pollution in Barcelona contributing a lot of patients to the overall high polluted patients.

| <b>Center</b>                                           | <b>Barcelona</b> | <b>Copenhagen</b> | <b>Essen</b> | <b>Groningen</b> | <b>Hannover</b> | <b>Leuven</b> | <b>Munich</b> |
|---------------------------------------------------------|------------------|-------------------|--------------|------------------|-----------------|---------------|---------------|
| N-value                                                 | 400              | 533               | 192          | 406              | 1087            | 583           | 412           |
| Time of lung transplantation                            | 1997-2011        | 1992-2011         | 1999-2011    | 1990-2011        | 1987-2011       | 1991-2011     | 1990-2011     |
| Age mean (SD)                                           | 46 (15)          | 48 (12)           | 52 (13)      | 44 (14)          | 44 (13)         | 48 (14)       | 47 (13)       |
| Gender(male) n-value (%)                                | 230 (58)         | 247 (46)          | 109 (57)     | 196 (48)         | 587 (54)        | 309 (53)      | 195 (47)      |
| Double lung transplantation, n-value (%)                | 285 (71)         | 232 (43)          | 180 (94)     | 325 (80)         | 938 (86)        | 439 (75)      | 245 (59)      |
| Underlying disease n-value (%)                          |                  |                   |              |                  |                 |               |               |
| Emphysema                                               | 151 (38)         | 351 (66)          | 95 (51)      | 173 (43)         | 328 (30)        | 270 (46)      | 119 (29)      |
| Cystic fibrosis                                         | 63 (16)          | 76 (14)           | 33 (17)      | 100 (25)         | 250 (23)        | 94 (16)       | 57 (14)       |
| Interstitial lung disease                               | 130 (33)         | 59 (11)           | 47 (25)      | 59 (15)          | 229 (21)        | 121 (21)      | 193 (47)      |
| Pulmonary arterial hypertension                         | 18 (5)           | 28 (5)            | 5 (3)        | 43 (11)          | 115 (11)        | 50 (9)        | 14 (3)        |
| Other                                                   | 38 (10)          | 19 (4)            | 9 (5)        | 31 (8)           | 165 (15)        | 48 (8)        | 29 (7)        |
| Mean (SD) road length (meter) in a specific buffer zone |                  |                   |              |                  |                 |               |               |
| 50m buffer zone                                         | 179 (73)         | 71 (57)           | 93 (50)      | 105 (58)         | 85 (52)         | 100 (49)      | 93 (59)       |
| 100m buffer zone                                        | 639 (225)        | 272 (153)         | 330 (133)    | 399 (164)        | 315 (132)       | 311 (125)     | 356 (145)     |
| 200m buffer zone                                        | 2400 (636)       | 1046 (460)        | 1237 (442)   | 1554 (578)       | 1148 (423)      | 1017 (463)    | 1277 (462)    |
| 500m buffer zone                                        | 13122 (3337)     | 5791 (2524)       | 6707 (2368)  | 8367 (3321)      | 6099 (2190)     | 5268 (2535)   | 6628 (2507)   |
| 1000m buffer zone                                       | 45375 (14002)    | 20109 (9552)      | 23383 (8177) | 28893 (12517)    | 20294 (7932)    | 18146 (8874)  | 21615 (9171)  |
| PM <sub>10</sub> mean (SD)                              | 32 (5)           | 19 (2)            | 25 (3)       | 25 (3)           | 22 (2)          | 26 (2)        | 22 (2)        |
| Distance to freeway mean (SD)                           | 9455 (21120)     | 16624 (30116)     | 5051 (6249)  | 7832 (8435)      | 12647 (14167)   | 7025 (6222)   | 12410 (12074) |
| Distance major road mean (SD)                           | 2671 (4857)      | 5785 (7559)       | 1477 (1601)  | 3055 (3962)      | 1716 (2550)     | 2073 (2280)   | 2264 (2979)   |



| Center                                              | Newcastle     | Oslo          | Pavia         | Utrecht       | Vienna        | Zurich       |
|-----------------------------------------------------|---------------|---------------|---------------|---------------|---------------|--------------|
| N-value                                             | 546           | 234           | 220           | 195           | 624           | 275          |
| Time of lung transplantation                        | 1987-2011     | 1990-2011     | 1991-2011     | 1989-2011     | 1989-2011     | 1992-2011    |
| Age mean (SD)                                       | 47 (13)       | 51 (11)       | 46 (13)       | 46 (13)       | 49 (13)       | 43.8 (16)    |
| Gender(male) n-value (%)                            | 278 (51)      | 112 (48)      | 149 (68)      | 96 (49)       | 330 (53)      | 144 (52)     |
| Double lung transplantation, n-value (%)            | 353 (65)      | 188 (80)      | 132 (60)      | 152 (78)      | 483 (77)      | 259 (94)     |
| Underlying disease n-value (%)                      |               |               |               |               |               |              |
| Emphysema                                           | 150 (27)      | 142 (61)      | 38 (17)       | 85 (44)       | 360 (58)      | 68 (25)      |
| Cystic fibrosis                                     | 201 (36)      | 18 (8)        | 42 (19)       | 59 (30)       | 88 (14)       | 100 (36)     |
| Interstitial lung disease                           | 102 (19)      | 24 (10)       | 70 (32)       | 34 (17)       | 107 (18)      | 64 (23)      |
| Pulmonary arterial hypertension                     | 41 (8)        | 15 (6)        | 45 (21)       | 4 (2)         | 44 (7)        | 16 (6)       |
| Other                                               | 52 (10)       | 35 (15)       | 25 (11)       | 13 (7)        | 25 (4)        | 27 (10)      |
| Mean (SD) road length (m) in a specific buffer zone |               |               |               |               |               |              |
| 50m buffer zone                                     | 96 (48)       | 234 (49)      | 127 (68)      | 116 (58)      | 88 (59)       | 94 (62)      |
| 100m buffer zone                                    | 331 (141)     | 119 (162)     | 464 (197)     | 462 (173)     | 330 (166)     | 356 (167)    |
| 200m buffer zone                                    | 1218 (467)    | 479 (555)     | 1563 (660)    | 1708 (536)    | 1174 (495)    | 1303 (553)   |
| 500m buffer zone                                    | 6498 (2604)   | 2763 (2830)   | 7915 (3492)   | 9621 (2934)   | 6374 (2854)   | 7057 (2856)  |
| 1000m buffer zone                                   | 22164 (9557)  | 9888 (9493)   | 26352 (12982) | 33729 (11068) | 22423 (11532) | 23317 (8922) |
| PM <sub>10</sub> mean (SD)                          | 19 (3)        | 13 (2)        | 33 (7)        | 27 (2)        | 24 (4)        | /            |
| Distance to freeway mean (SD)                       | 29113 (47812) | 50387 (77672) | 11716 (15059) | 4959 (5232)   | 10912 (15411) | 5436 (7075)  |
| Distance major road mean (SD)                       | 2862 (4058)   | 1493 (2238)   | 3959 (6177)   | 2272 (2728)   | 2036 (3109)   | 1595 (2048)  |

**Table E1:** Extended patient characteristics and exposures per lung transplant center

| <b>Death</b>               | No correction for macrolides |              |                    |               | Correction for macrolides |                    |              |
|----------------------------|------------------------------|--------------|--------------------|---------------|---------------------------|--------------------|--------------|
|                            | IQR                          | HR           | 95% CI             | P             | HR                        | 95% CI             | P            |
| Road length in buffer zone |                              |              |                    |               |                           |                    |              |
| 50 m                       | <b>108m</b>                  | <b>1.089</b> | <b>1.013-1.169</b> | <b>0.0206</b> | <b>1.084</b>              | <b>1.007-1.167</b> | <b>0.032</b> |
| 100 m                      | 279m                         | <b>1.097</b> | <b>1.028-1.171</b> | <b>0.0043</b> | <b>1.079</b>              | <b>1.008-1.156</b> | <b>0.028</b> |
| 200 m                      | 752m                         | <b>1.078</b> | <b>1.023-1.135</b> | <b>0.0068</b> | <b>1.062</b>              | <b>1.007-1.127</b> | <b>0.031</b> |
| 500 m                      | 4092m                        | <b>1.003</b> | <b>1.042-1.130</b> | <b>0.0023</b> | <b>1.003</b>              | <b>1.000-1.085</b> | <b>0.020</b> |
| 1000 m                     | 15403m                       | <b>1.080</b> | <b>1.016-1.131</b> | <b>0.012</b>  | 1.047                     | 1.00-1.113         | 0.081        |
| PM <sub>10</sub>           | 6 µg/m <sup>3</sup>          | 1.019        | 0.982-1.106        | 0.18          | 1.019                     | 0.982-1.049        | 0.17         |
| Distance to freeway        | 1233m                        | 0.976        | 0.927-1.012        | 0.55          | 0.976                     | 0.917-1.050        | 0.57         |
| Distance to major road     | 241m                         | 0.976        | 0.908-1.024        | 0.32          | 0.976                     | 0.952-1.000        | 0.25         |
| <b>CLAD</b>                |                              |              |                    |               |                           |                    |              |
| Road length in buffer zone |                              |              |                    |               |                           |                    |              |
| 50 m                       | 108m                         | 1.047        | 0.972-1.127        | 0.23          | 1.050                     | 0.974-1.804        | 0.20         |
| 100 m                      | 279m                         | 1.014        | 0.943-1.091        | 0.70          | 1.022                     | 0.948-1.100        | 0.57         |
| 200 m                      | 752m                         | 1.023        | 0.972-1.086        | 0.41          | 1.030                     | 0.978-1.094        | 0.28         |
| 500 m                      | 4092m                        | 1.042        | 1.000-1.130        | 0.063         | <b>1.085</b>              | <b>1.000-1.130</b> | <b>0.034</b> |
| 1000 m                     | 15403m                       | 1.031        | 0.970-1.097        | 0.25          | 1.047                     | 0.985-1.097        | 0.17         |
| PM <sub>10</sub>           | 6 µg/m <sup>3</sup>          | 1.018        | 0.947-1.093        | 0.66          | 1.012                     | 0.941-1.087        | 0.75         |
| Distance to freeway        | 1233m                        | 1.038        | 0.976-1.103        | 0.32          | 1.038                     | 0.976-1.103        | 0.30         |
| Distance to major road     | 241m                         | 1.000        | 0.953-1.075        | 0.99          | 1.000                     | 0.976-1.024        | 0.99         |

**Table E2:** Analysis of Cox analysis without stratification for macrolide use. We corrected for patient age, patient gender, native disease (COPD vs ILD vs cystic fibrosis and bronchiectasis vs pulmonary hypertension vs others), type of transplantation (single versus sequential single), era of transplantation (1987-1995 vs 1996-2000 vs 2001-2005 vs 2006-2011), macrolides (no correction for macrolides left, correction for macrolides right).

| <b>Death</b>               | $P_{\text{interaction}}$ | <b>CLAD</b>                | $P_{\text{interaction}}$ |
|----------------------------|--------------------------|----------------------------|--------------------------|
| Road length in buffer zone |                          | Road length in buffer zone |                          |
| 50m                        | 0.013                    | 50m                        | 0.033                    |
| 100m                       | 0.47                     | 100m                       | 0.45                     |
| 200m                       | <0.0001                  | 200m                       | 0.0049                   |
| 500m                       | <0.0001                  | 500m                       | 0.25                     |
| 1000m                      | <0.0001                  | 1000m                      | 0.39                     |
| PM <sub>10</sub>           | 0.005                    | PM <sub>10</sub>           | 0.041                    |
| Distance to freeway        | 0.61                     | Distance to freeway        | 0.39                     |
| Distance to major road     | 0.0008                   | Distance to major road     | 0.081                    |

**Table E3:** Within the Cox analysis we corrected for patient age, patient gender, native disease (COPD vs ILD vs cystic fibrosis and bronchiectasis vs pulmonary hypertension vs others), type of transplantation (single versus sequential single), era of transplantation (1987-1995 vs 1996-2000 vs 2001-2005 vs 2006-2011), macrolides (yes-no) and the interaction term between macrolides and the predictive variable. P values shown are for the interaction between macrolides and the predictive variable reflecting air pollution.

| quintiles | mortality and road length (200m) |                |              | CLAD and road length (200m) |                |              |
|-----------|----------------------------------|----------------|--------------|-----------------------------|----------------|--------------|
|           | HR                               | 95% CI         | P-value      | HR                          | 95% CI         | P-value      |
| <b>Q1</b> | <b>REF</b>                       | <b>Overall</b> | <b>0.029</b> | <b>REF</b>                  | <b>Overall</b> | <b>0.17</b>  |
| Q2        | 1.063                            | 0.916-1.235    | 0.43         | 1.063                       | 0.916-1.235    | 0.21         |
| Q3        | 1.107                            | 0.952-1.287    | 0.17         | 1.107                       | 0.952-1.287    | 0.13         |
| Q4        | 1.084                            | 0.930-1.263    | 0.59         | 1.173                       | 0.983-1.401    | 0.13         |
| Q5        | 1.279                            | 1.092-1.480    | 0.0033       | 1.265                       | 1.046-1.524    | 0.012        |
|           | mortality and PM <sub>10</sub>   |                |              | CLAD and PM <sub>10</sub>   |                |              |
| <b>Q1</b> | <b>REF</b>                       | <b>overall</b> | <b>0.10</b>  | <b>REF</b>                  | <b>Overall</b> | <b>0.014</b> |
| Q2        | 1.077                            | 0.904-1.283    | 0.41         | 0.988                       | 0.813-1.200    | 0.91         |
| Q3        | 1.206                            | 1.022-1.422    | 0.027        | 1.257                       | 1.043-1.257    | 0.016        |
| Q4        | 1.246                            | 1.035-1.501    | 0.020        | 1.024                       | 0.82-1.278     | 0.83         |
| Q5        | 1.217                            | 1.003-1.476    | 0.046        | 1.238                       | 0.985-1.550    | 0.066        |

**Table E4:** Hazard ratio's for both mortality and CLAD comparing the quintiles of particulate matter (PM<sub>10</sub>) versus the lowest quintile which is used as reference value (Q1).

|                                             | mortality |       |             |                   | CLAD |       |             |               |
|---------------------------------------------|-----------|-------|-------------|-------------------|------|-------|-------------|---------------|
|                                             | N         | HR    | 95% CI      | P-value           | N    | HR    | 95% CI      | P-value       |
| <b>200 m road length (+752m)</b>            |           |       |             |                   |      |       |             |               |
| Main model                                  | 3556      | 1.094 | 1.030-1.779 | <b>0.0054</b>     | 3551 | 1.11  | 1.023-1.204 | <b>0.0114</b> |
| <b>Sensitivity analysis for SES</b>         |           |       |             |                   |      |       |             |               |
| Subgroup                                    | 1199      | 1.119 | 1.008-1.249 | <b>0.037</b>      | 1198 | 1.127 | 0.985-1.295 | 0.087         |
| Subgroup+SES                                | 1199      | 1.119 | 1.008-1.249 | <b>0.042</b>      | 1198 | 1.135 | 0.985-1.305 | 0.079         |
| SES (REF=high)                              |           |       |             |                   |      |       |             |               |
| SES moderate                                | 1199      | 1.321 | 0.943-1.852 | 0.11              | 1198 | 0.808 | 0.564-1.158 | 0.23          |
| SES low                                     | 1199      | 1.253 | 0.919-1.708 | 0.15              | 1198 | 0.822 | 0.597-1.132 | 0.25          |
| <b>Sensitivity analysis for smoking</b>     |           |       |             |                   |      |       |             |               |
| Subgroup                                    | 1159      | 1.24  | 1.119-1.383 | <b>&lt;0.0001</b> | 1157 | 1.222 | 1.062-1.413 | <b>0.0060</b> |
| Subgroup+smoking                            | 1159      | 1.24  | 1.119-1.383 | <b>&lt;0.0001</b> | 1157 | 1.222 | 1.062-1.403 | <b>0.0063</b> |
| Smoking                                     | 1159      | 1.074 | 0.872-1.323 | 0.50              | 1157 | 0.903 | 0.681-1.197 | 0.48          |
| <b>PM<sub>10</sub> (+6µg/m<sup>3</sup>)</b> |           |       |             |                   |      |       |             |               |
| Main Model                                  | 3556      | 1.081 | 1.000-1.167 | <b>0.049</b>      | 3551 | 1.093 | 0.988-1.208 | 0.076         |
| <b>Sensitivity analysis for SES</b>         |           |       |             |                   |      |       |             |               |
| Subgroup                                    | 1068      | 1.012 | 0.886-1.160 | 0.84              | 1067 | 1.16  | 0.982-1.371 | 0.083         |
| Subgroup+SES                                | 1068      | 1.012 | 0.886-1.160 | 0.84              | 1067 | 1.16  | 0.982-1.371 | 0.079         |
| SES (REF=high)                              |           |       |             |                   |      |       |             |               |
| SES moderate                                | 1068      | 1.198 | 0.861-1.666 | 0.28              | 1067 | 0.824 | 0.565-1.201 | 0.31          |
| SES low                                     | 1068      | 1.226 | 0.858-1.751 | 0.26              | 1067 | 0.815 | 0.580-1.145 | 0.24          |
| <b>Sensitivity analysis smoking</b>         |           |       |             |                   |      |       |             |               |
| Subgroup                                    | 1152      | 1.055 | 0.936-1.201 | 0.38              | 1150 | 1.222 | 1.030-1.451 | <b>0.020</b>  |
| Subgroup+smoking                            | 1152      | 1.055 | 0.936-1.201 | 0.34              | 1150 | 1.222 | 1.030-1.451 | <b>0.022</b>  |
| Smoking                                     | 1152      | 1.065 | 0.864-1.313 | 0.55              | 1150 | 0.932 | 0.702-1.236 | 0.66          |

**Table E5:** The sensitivity analysis showing the association of mortality and CLAD with the road length in a 200m buffer zone and PM<sub>10</sub> after correction for pre-transplant smoking (Yes/No) and SES coded according to pre-transplant occupation (low-moderate-high).

|                                    | macrolides before CLAD or no CLAD<br>(n=1325) |             |         | macrolide at/after CLAD (n=782) |             |        |
|------------------------------------|-----------------------------------------------|-------------|---------|---------------------------------|-------------|--------|
|                                    | HR                                            | 95% CI      | P-value | HR                              | 95% CI      |        |
| death and road length 200m buffer* | 0.980                                         | 0.958-1.002 | 0.075   | 1.012                           | 0.992-1.032 | 0.25   |
| CLAD and road length *             | 0.987                                         | 0.969-1.006 | 0.18    | 1.010                           | 0.998-1.023 | 0.11   |
| death and road length no center    | 0.992                                         | 0.974-1.009 | 0.35    | 1.025                           | 1.007-1.043 | 0.0052 |
| CLAD and road length no center     | 0.982                                         | 0.967-0.997 | 0.019   | 1.014                           | 1.003-1.026 | 0.017  |

\* In the Cox analysis we corrected for patient age, patient gender, native disease (COPD vs ILD vs cystic fibrosis and bronchiectasis vs pulmonary hypertension vs others), type of transplantation (single versus sequential single), era of transplantation (1987-1995 vs 1996-2000 vs 2001-2005 vs 2006-2011).

**Table E6:** Sensitivity analysis for time of macrolide initiation stratifying according to the time of macrolide initiation being either macrolides before CLAD diagnosis or never developing CLAD (n=1325, possible protective effect) vs. patients treated with macrolides at CLAD diagnosis or after CLAD diagnosis (n=782, no possible protective effect since CLAD is already diagnosed).

|                                   | Never macrolide therapy |             |         | Ever macrolide therapy |             |         |
|-----------------------------------|-------------------------|-------------|---------|------------------------|-------------|---------|
|                                   | HR                      | 95% CI      | P-value | HR                     | 95% CI      | P-value |
| death and road length 200m buffer | 1.130                   | 1.063-1.201 | 0.0001  | 0.924                  | 0.838-1.018 | 0.11    |
| CLAD and road length 200m buffer  | 1.120                   | 1.050-1.194 | 0.0006  | 0.776                  | 0.699-0.861 | 0.0001  |

\* In the Cox analysis we corrected for patient age, patient gender, native disease (COPD vs ILD vs cystic fibrosis and bronchiectasis vs pulmonary hypertension vs others), type of transplantation (single versus sequential single), era of transplantation (1987-1995 vs 1996-2000 vs 2001-2005 vs 2006-2011) and azithromycin as a time-dependent variable.

**Table E7:** Time-dependency of macrolide therapy

| mortality and road length in 200m buffer |      |       |             |               | CLAD and road length in 200m buffer |       |             |               |
|------------------------------------------|------|-------|-------------|---------------|-------------------------------------|-------|-------------|---------------|
| cut-off                                  | N    | HR    | 95% CI      | P-value       | N                                   | HR    | 95% CI      | P-value       |
| 500 km                                   | 3387 | 1.114 | 1.045-1.188 | <b>0.0014</b> | 3377                                | 1.118 | 1.029-1.205 | <b>0.0072</b> |
| 700 km                                   | 3556 | 1.094 | 1.030-1.779 | <b>0.0054</b> | 3544                                | 1.11  | 1.023-1.204 | <b>0.011</b>  |
| 1000 km                                  | 3664 | 1.091 | 1.022-1.363 | <b>0.0063</b> | 3650                                | 1.083 | 1.007-1.172 | <b>0.037</b>  |
| No cut-off                               | 3731 | 1.075 | 1.015-1.147 | 0.012         | 3717                                | 1.075 | 1.000-1.155 | 0.053         |

  

| mortality and PM <sub>10</sub> |      |       |             |              | CLAD and PM <sub>10</sub> |       |             |         |
|--------------------------------|------|-------|-------------|--------------|---------------------------|-------|-------------|---------|
| cut-off                        | N    | HR    | 95% CI      | P-value      | N                         | HR    | 95% CI      | P-value |
| 500 km                         | 3243 | 1.093 | 1.012-1.187 | <b>0.028</b> | 3234                      | 1.093 | 0.988-1.215 | 0.084   |
| 700 km                         | 3412 | 1.081 | 1.000-1.167 | <b>0.049</b> | 3400                      | 1.093 | 0.988-1.208 | 0.076   |
| 1000 km                        | 3517 | 1.068 | 0.994-1.153 | 0.082        | 3504                      | 1.081 | 0.982-1.194 | 0.11    |
| No cut-off                     | 3583 | 1.055 | 0.976-1.139 | 0.17         | 3570                      | 1.087 | 0.988-1.194 | 0.088   |

**Table E8:** The effect of investigating the association between pollution parameters and CLAD/mortality stratified according to different proposed cut-off values for distance from transplant center. We introduced this as an inclusion criterion as patients living further from their transplant center are more likely to be lost to follow-up or more rarely visit out-patient clinic. A relationship between inferior outcome and distance from transplant center has been previously demonstrated after allogeneic hematopoietic stem cell transplantation and kidney transplantation (Abou-nassar et al. 2011 and Axelrod et al. 2010). Indeed, in our database the 225 patients living >700 km from transplant center tended to experience worse survival (p=0.073, HR 1.186; 0.984-1.430), which can introduce bias in our analysis. This table alternatively also shows the association when patients living >500 km and >1000 km from the transplant center were excluded from the analysis from the main model, while also showing the results when no cut-off is used. This clearly demonstrates the bias that including those patients will cause.
